# Supplementary material for: Interaction of miR-200a-3p with YAP regulates cell proliferation and metastasis differentially in HPV-positive and HPV-negative cervical cancer cells
Source: PubMed Central journal article supplement (PMC9533500; doi:10.1186/s12885-022-10118-0), 2022-10-04

### Supplementary Fig. S1 qRT-PCR assessments of transfection efficiencies

The transfection efficiencies of miR-200a-3p mimics (A), sh-miR-200a-3p (B), and YAP (C) were performed in C33A, Siha and Hela cells. \* $p < 0.05$ , \*\* $p < 0.01$ , \*\*\* $p < 0.001$ , ns: not significant.

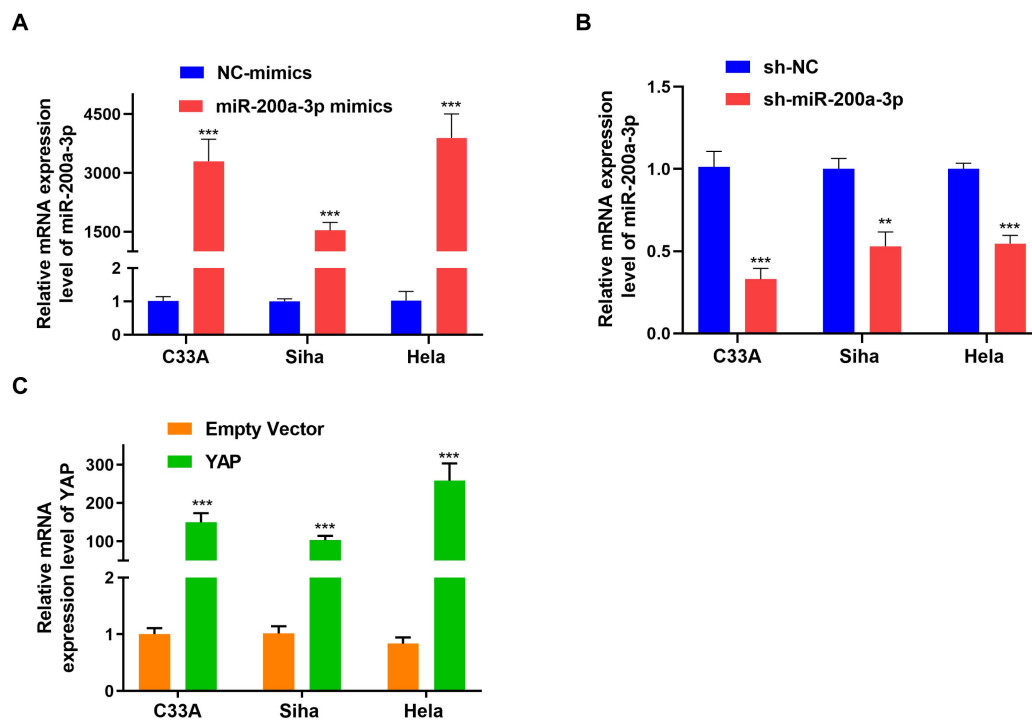

## Supplementary Fig. S2 the mRNA and protein levels of YAP in HeLa cells

Significant decreases in levels of YAP mRNA (A) and YAP protein (B) following up-regulations of miR-200a-3p, or significant increases in levels of YAP mRNA (C) and protein (D) following down-regulations of miR-200a-3p were not observed in HeLa cells. \* $p < 0.05$ , \*\* $p < 0.01$ , \*\*\* $p < 0.001$ , ns: not significant.

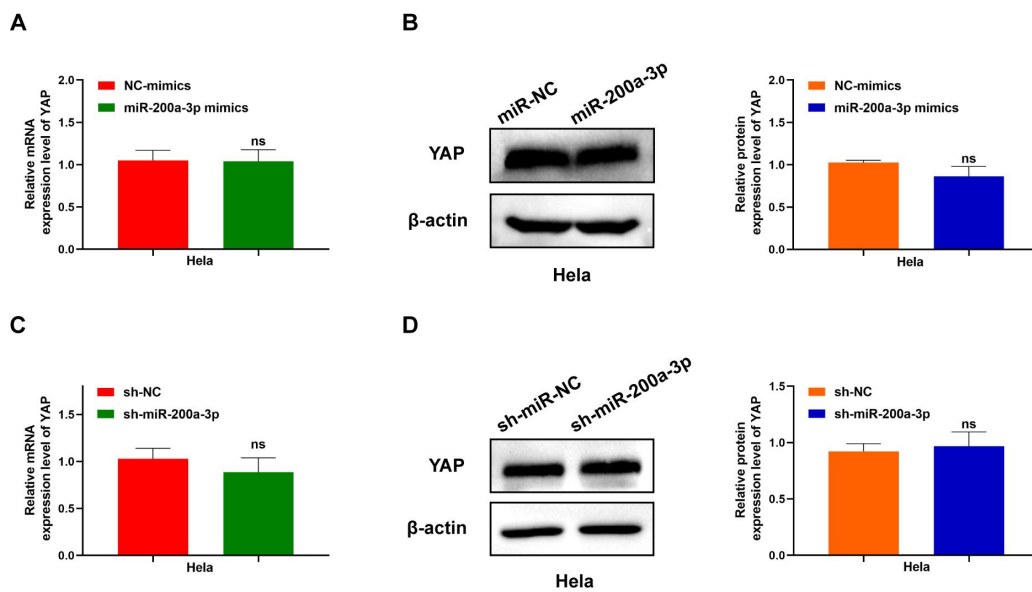

Supplement: 12885_2022_10118_MOESM1_ESM.pdf [file 12885_2022_10118_MOESM1_ESM.pdf]
