# Supplementary material for: Interaction of miR-200a-3p with YAP regulates cell proliferation and metastasis differentially in HPV-positive and HPV-negative cervical cancer cells
Source: PubMed Central journal article supplement (PMC9533500; doi:10.1186/s12885-022-10118-0), 2022-10-04

**Fig. 2H** Full-length blots in Figure 2H C33A (left) and Siha (right) cells. The red solid lines are the figures in the manuscript.

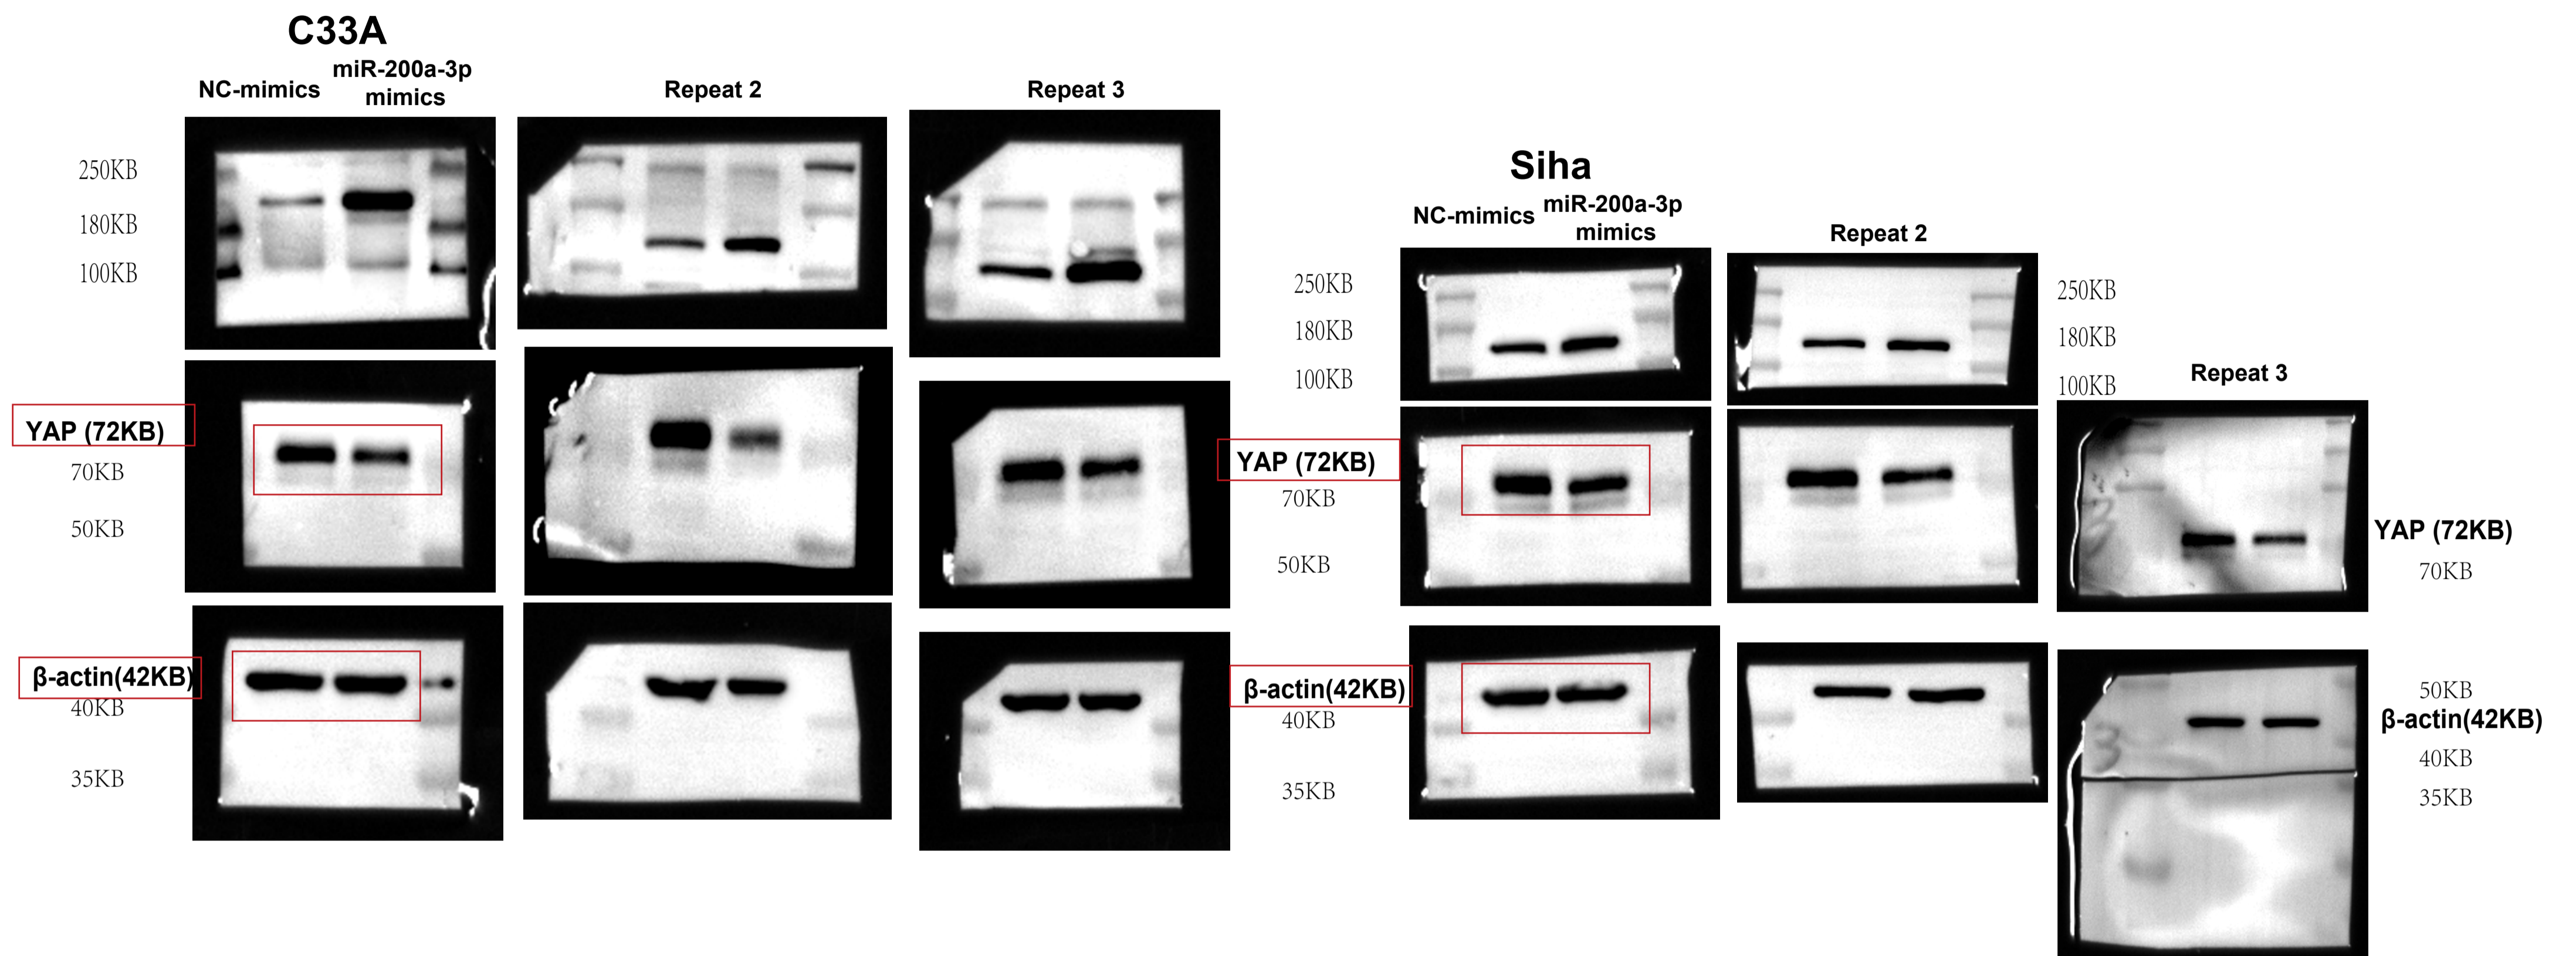

**Fig. 2J** Full-length blots in Figure 2J C33A (left) and Siha (right) cells. The red solid lines are the figures in the manuscript.

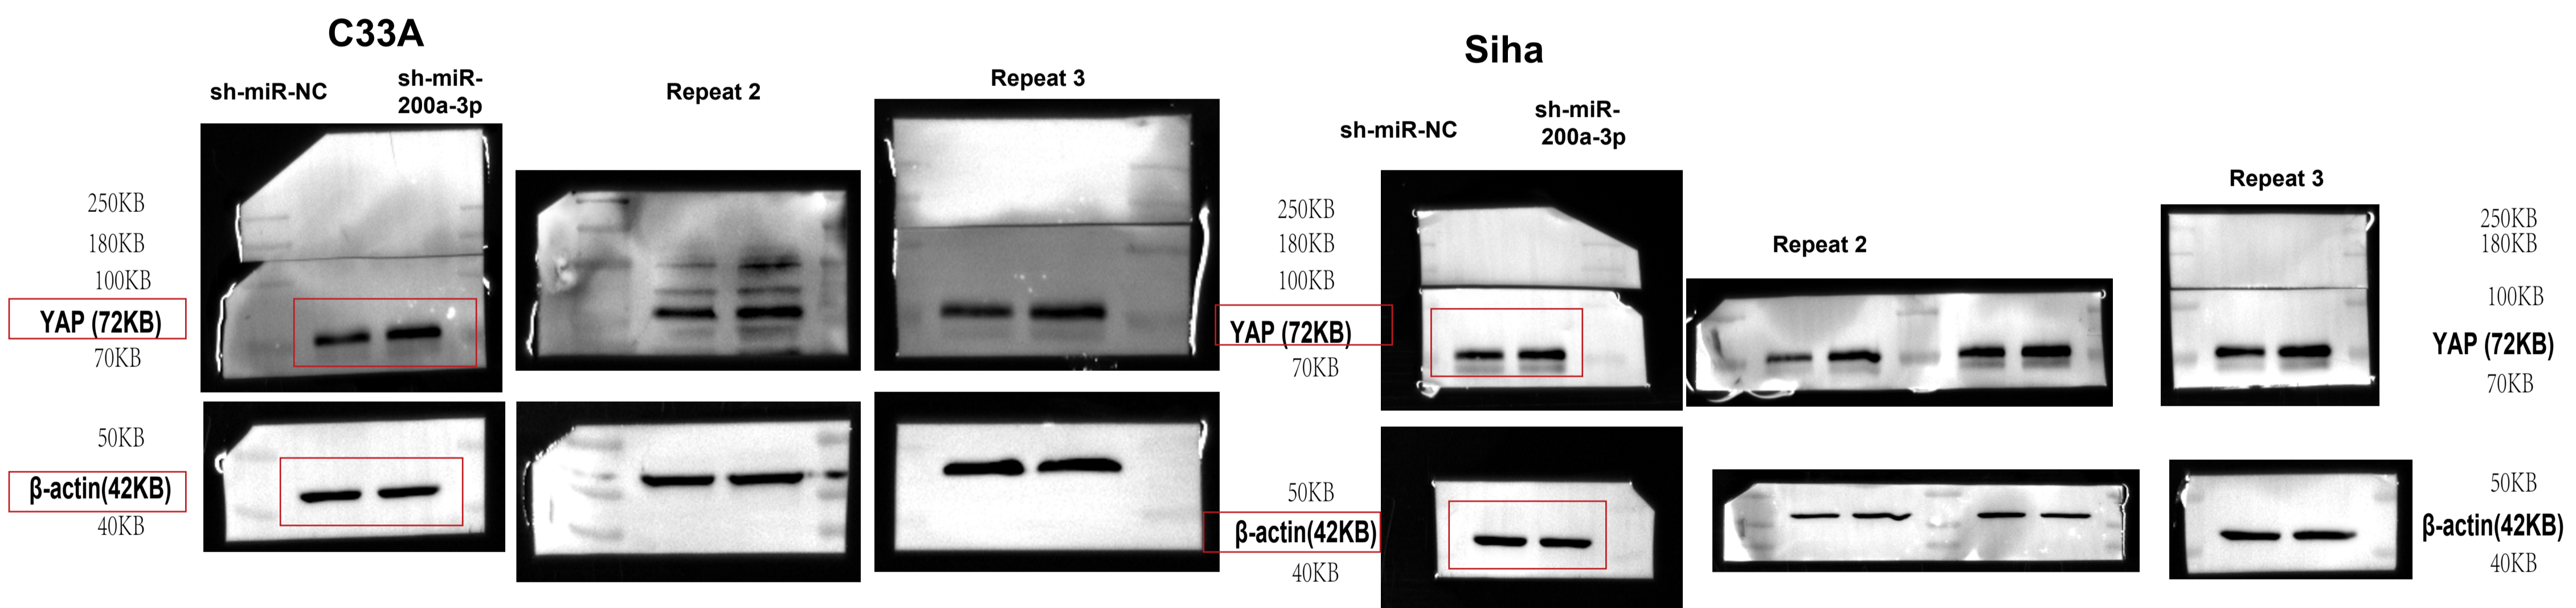

**Supplementary Fig. S2** Full-length blots in Supplementary Fig S2. The red solid lines are the figures in the manuscript.

**Supplementary Fig. S2B**

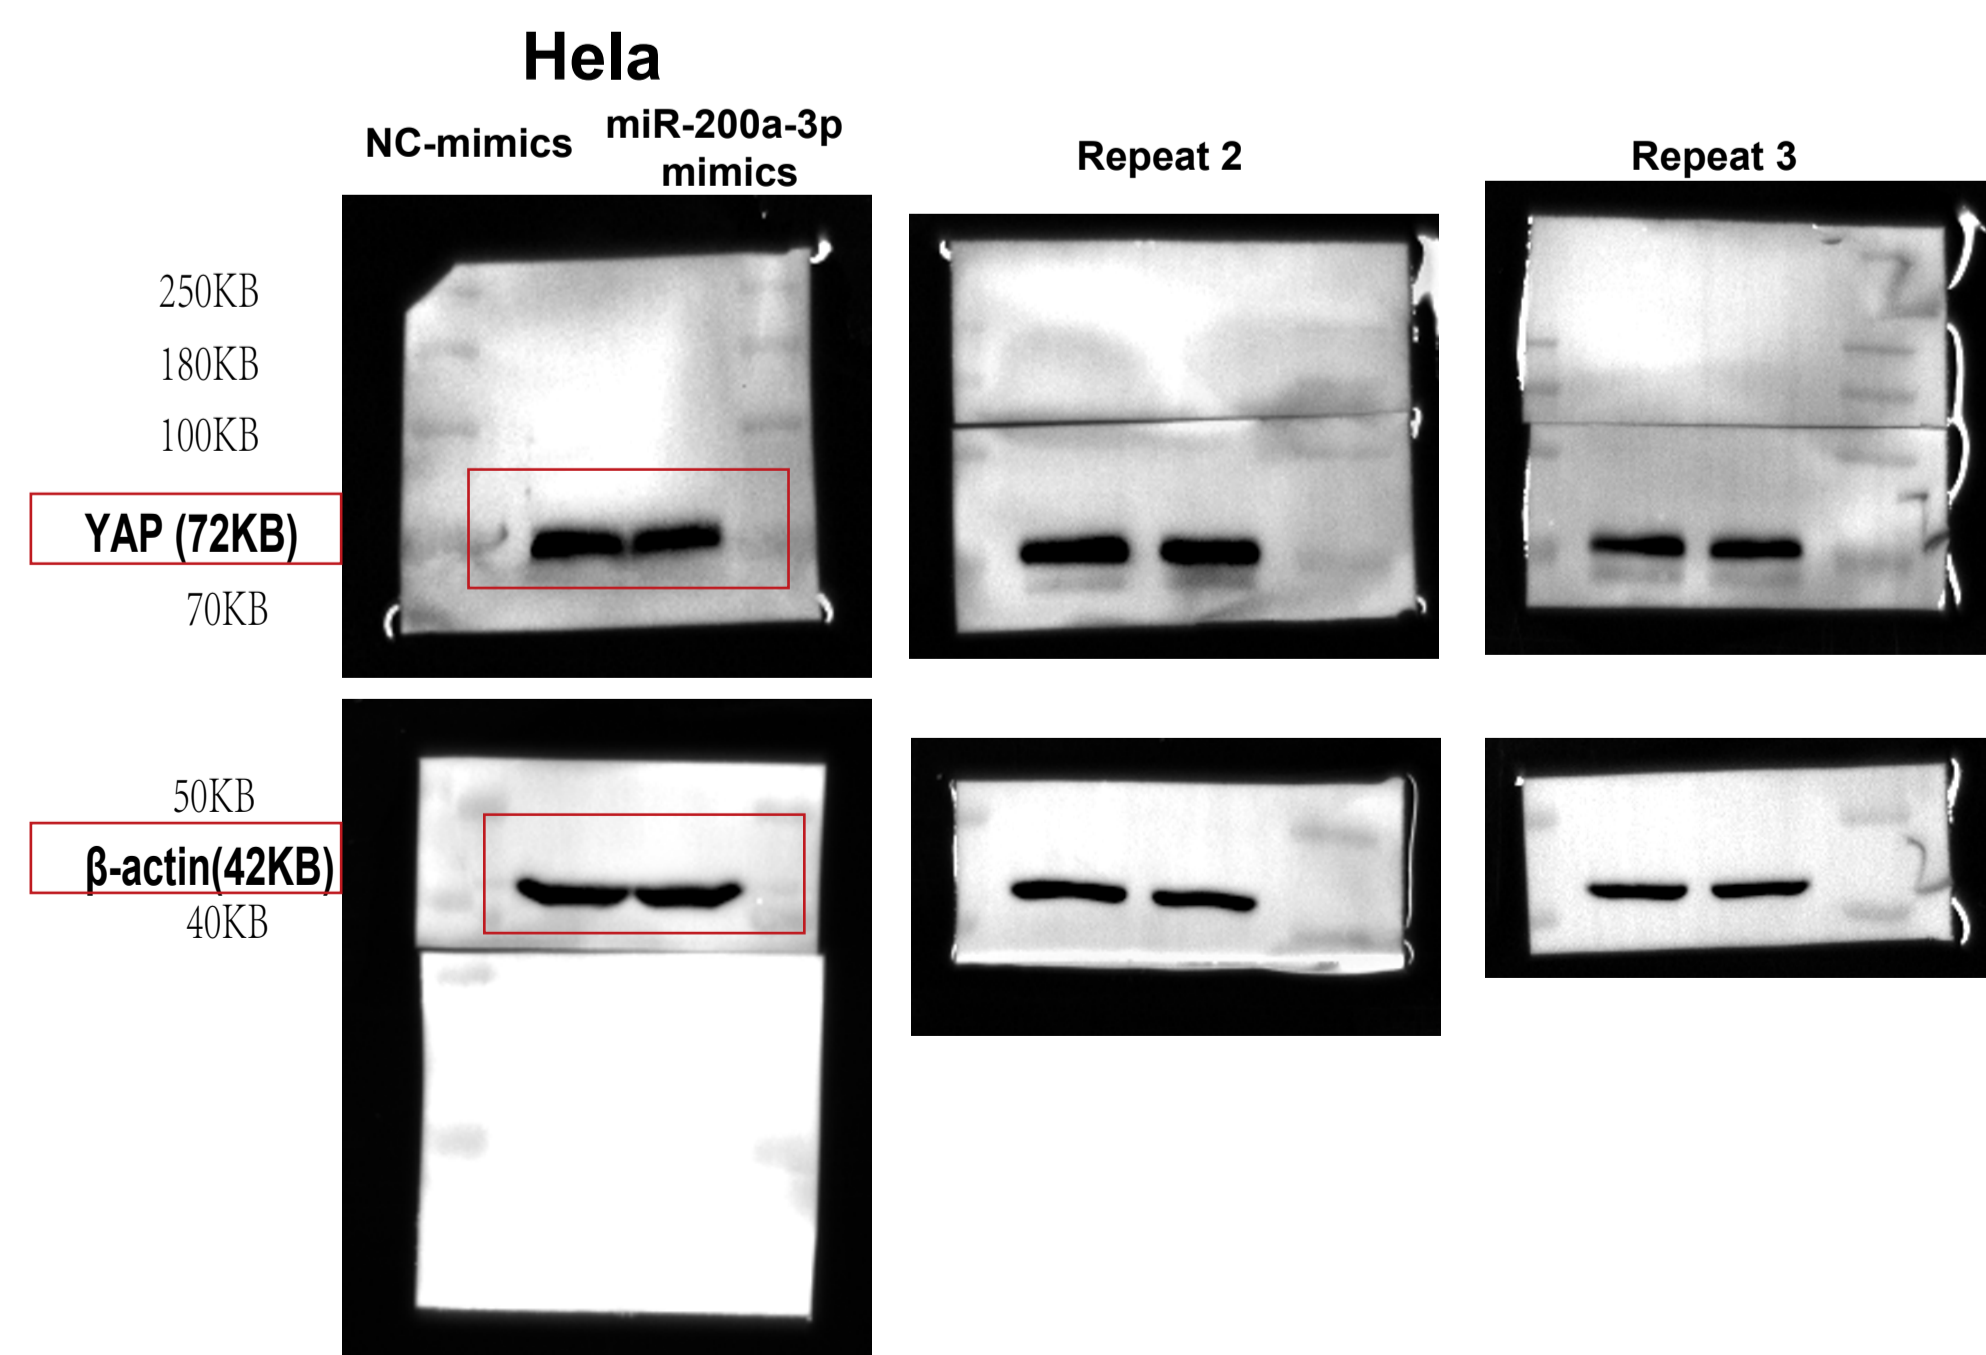

**Supplementary Fig. S2D**

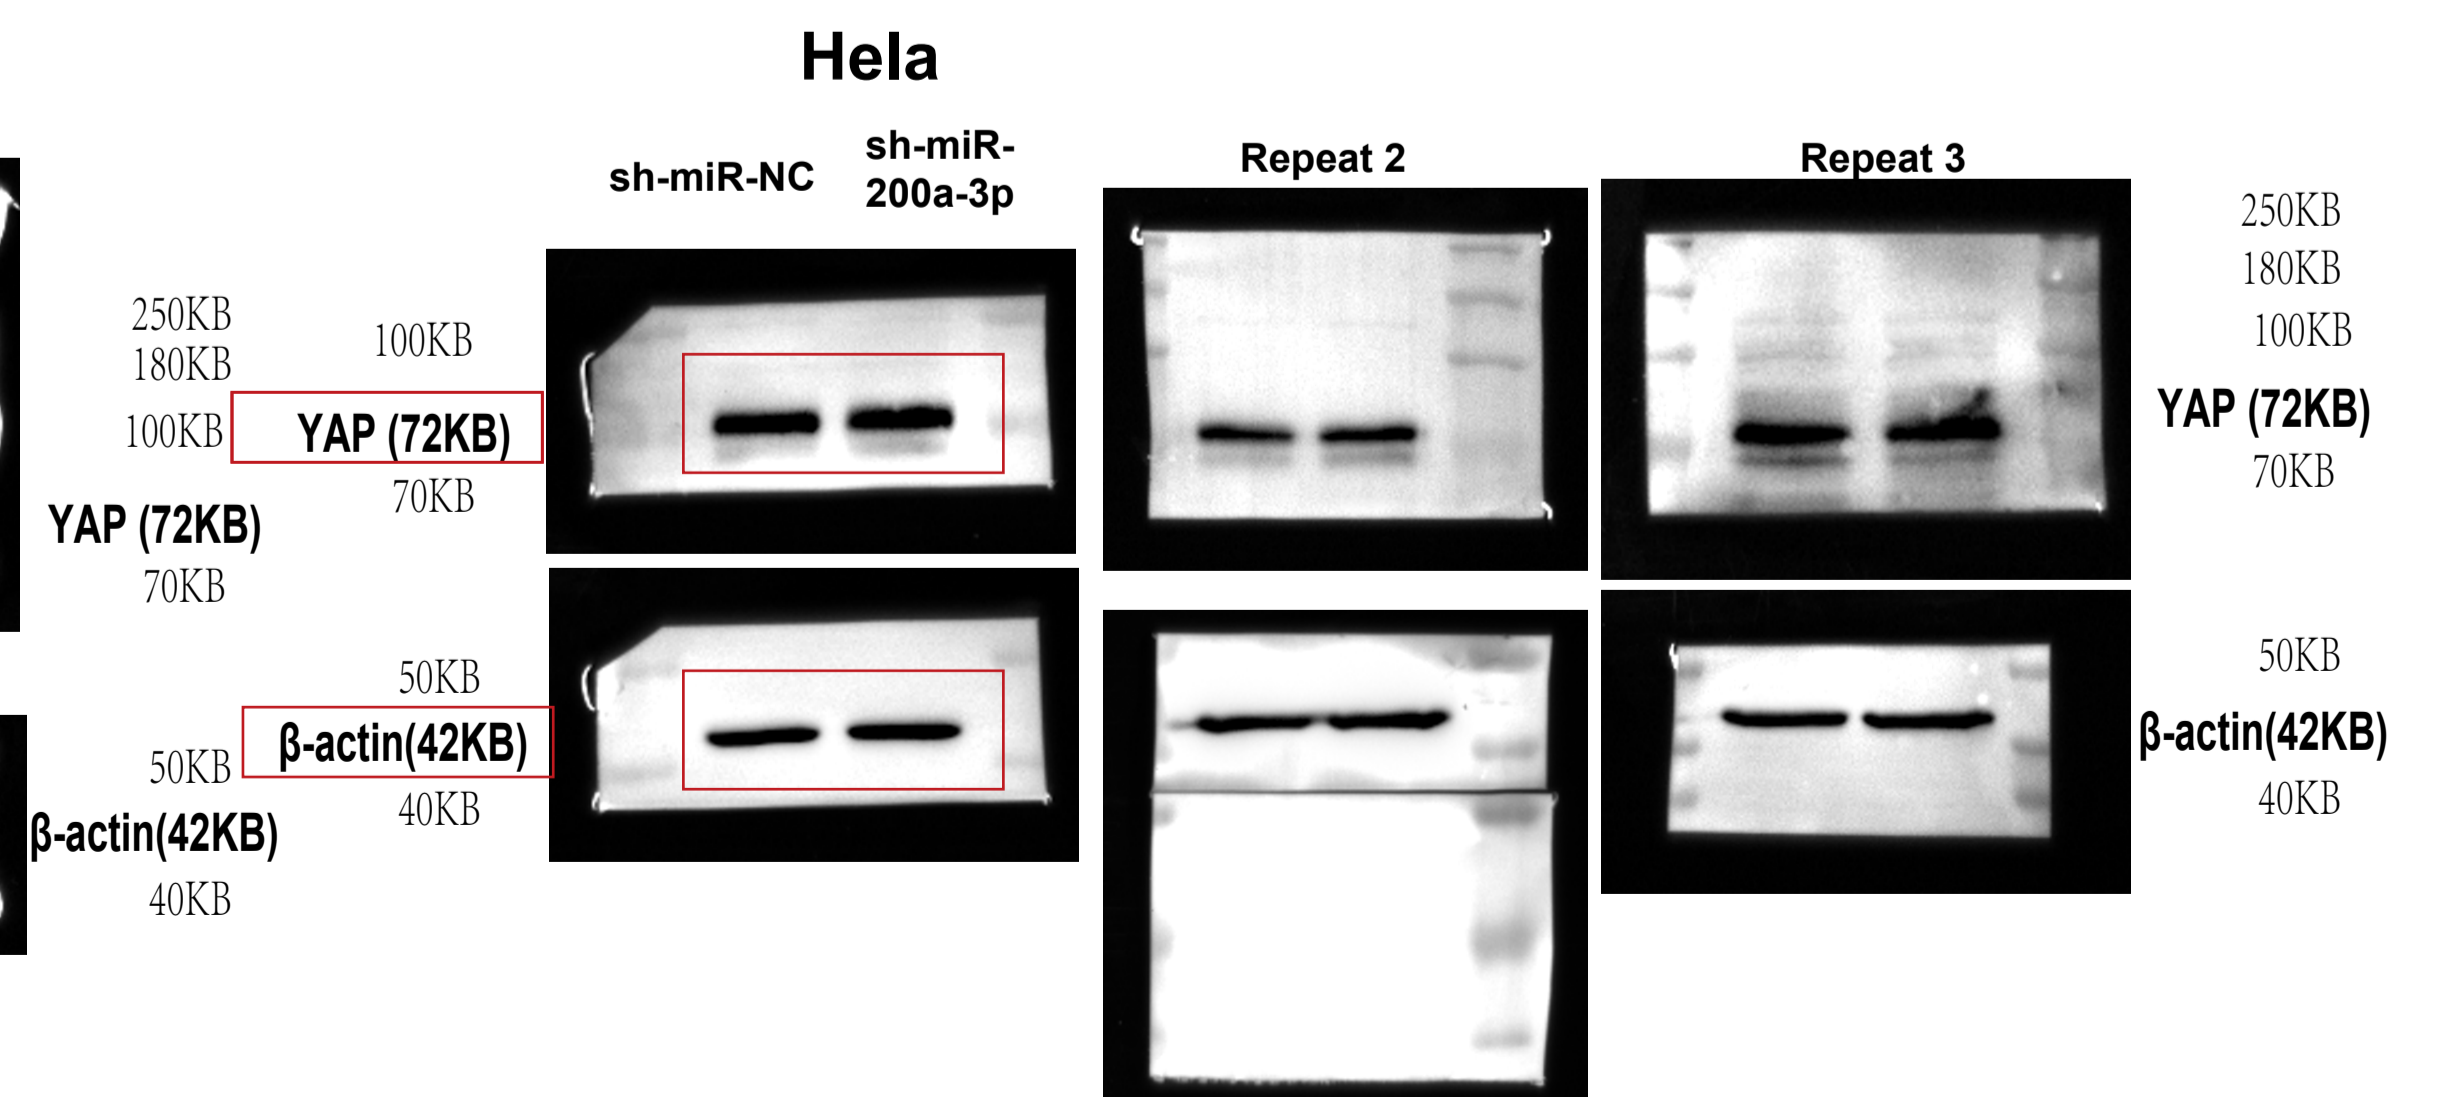

Supplement: 12885_2022_10118_MOESM2_ESM.pdf [file 12885_2022_10118_MOESM2_ESM.pdf]
